# Supplementary figures and images for: ATM Kinase Inhibition Preferentially Sensitizes p53-Mutant Glioma to Ionizing Radiation
Source: Oxford University Press journal article supplement (doi:10.1158/1078-0432.ccr-12-3408), 2013-04-26

### U87

0

10 Gy – 16 hr

BrdU

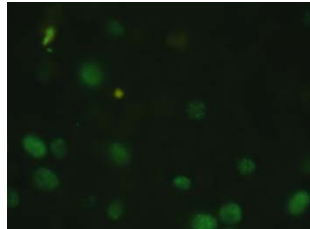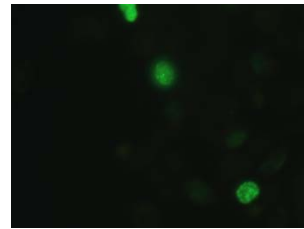

DAPI

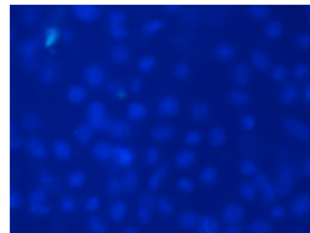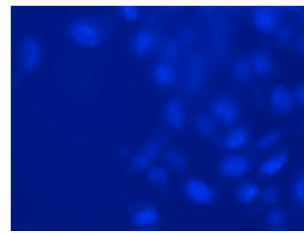

% BrdU+:

14

7

### U87-281G

0

10 Gy – 16 hr

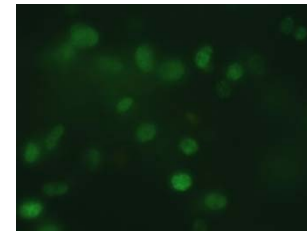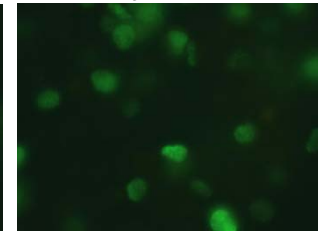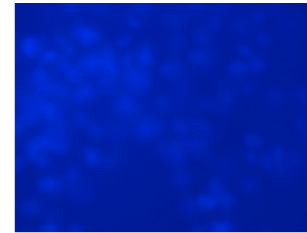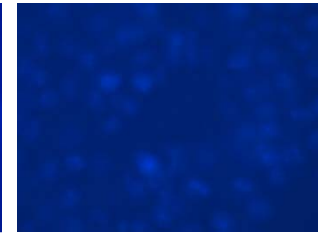

21

24

Figure S6.

Supplement: 10780432ccr123408-sup-fig_6_pdf_150k.pdf [file 10780432ccr123408-sup-fig_6_pdf_150k.pdf]
